# Supplementary material for: Concerning the eXclusion in human genomics: the choice of sex chromosome representation in the human genome drastically affects the number of identified variants
Source: PubMed Central journal article supplement (PMC10542555; doi:10.1093/g3journal/jkad169), 2023-07-27
Supplement: jkad169_supplementary_data.pdf [file jkad169_supplementary_data.pdf]

# Supplementary Materials

**Supplemental Figure 1:** Major allele frequency plots for all SNPs in each of the three X chromosome regions that possess high sequence similarity to the Y chromosome.

**PAR1; Default**

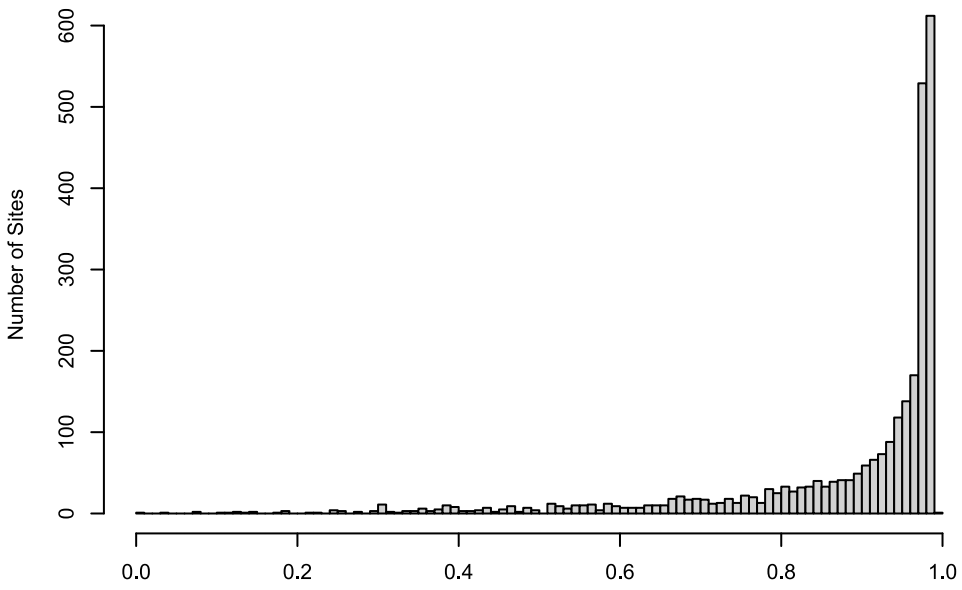

**PAR1; SCC-aware**

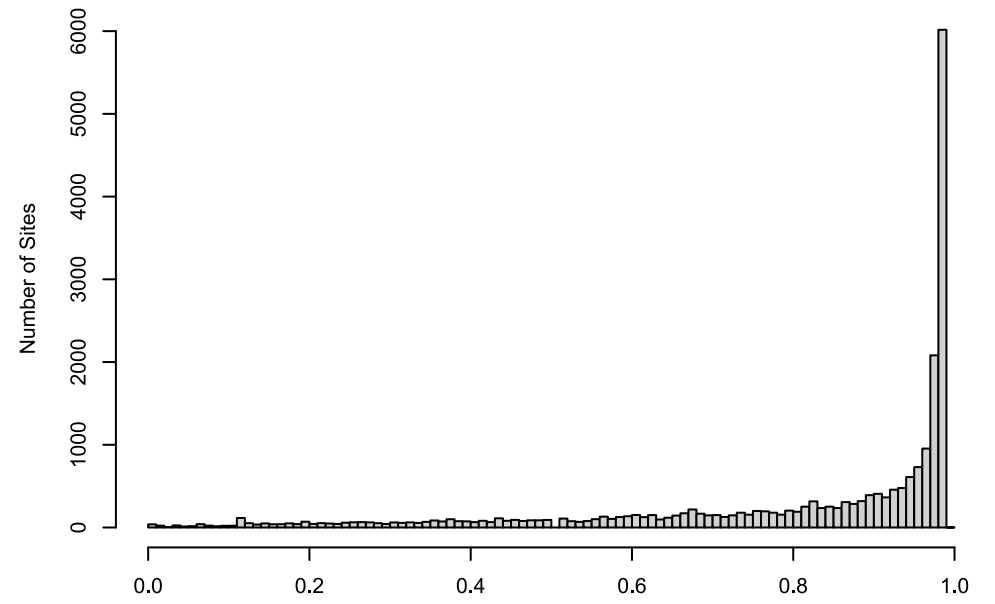

**PAR2; Default**

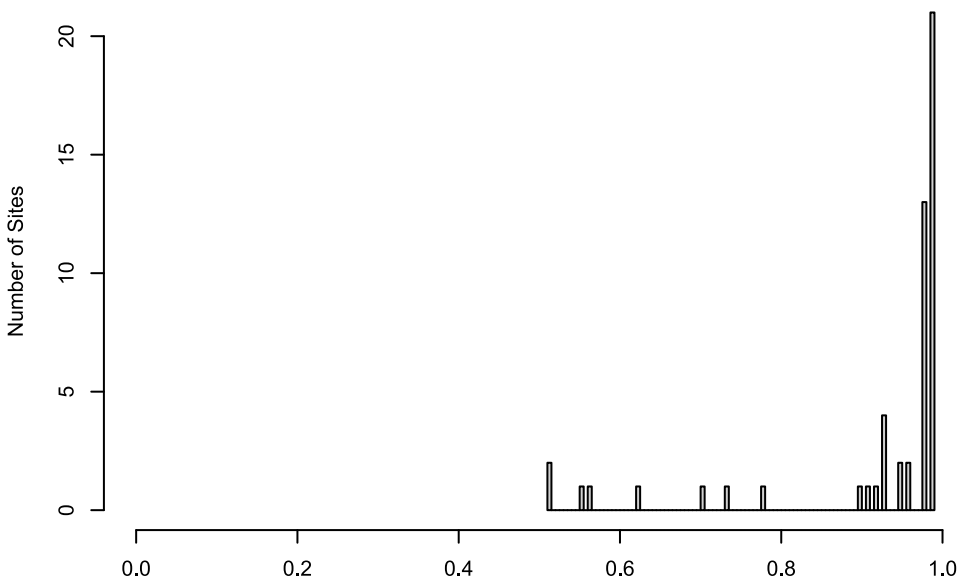

**PAR2; SCC-aware**

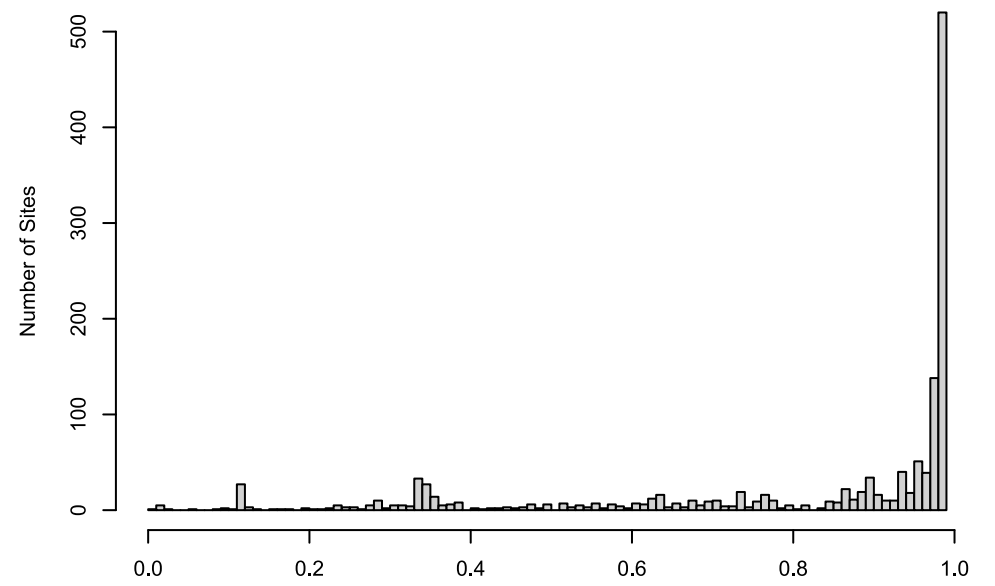

**XTR; Default**

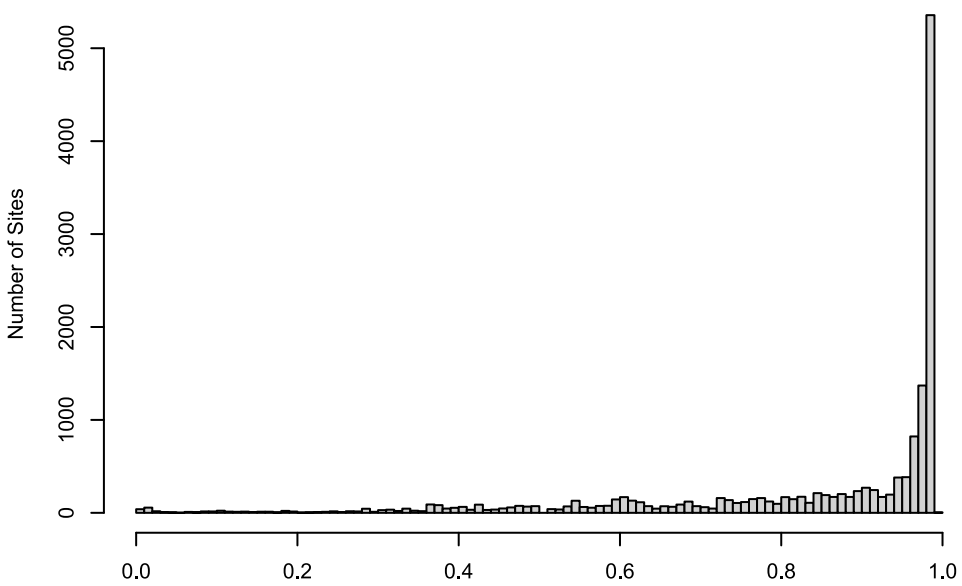

**XTR; SCC-aware**

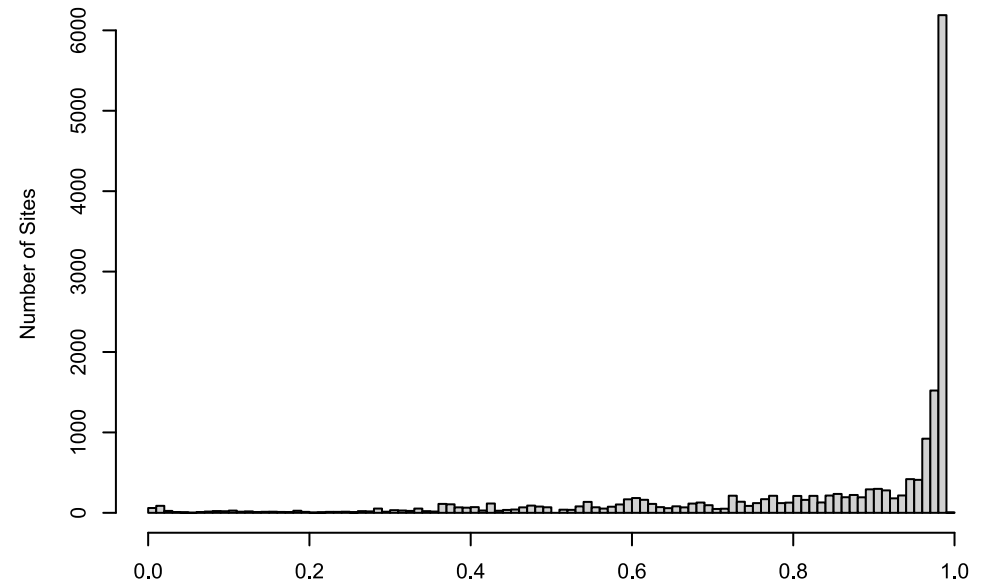

**Supplemental Figure 2:** Major allele frequency plots for non-overlapping SNPs between the two reference configurations in each of the three X chromosome regions that possess high sequence similarity to the Y chromosome.

**PAR1; Default-only**

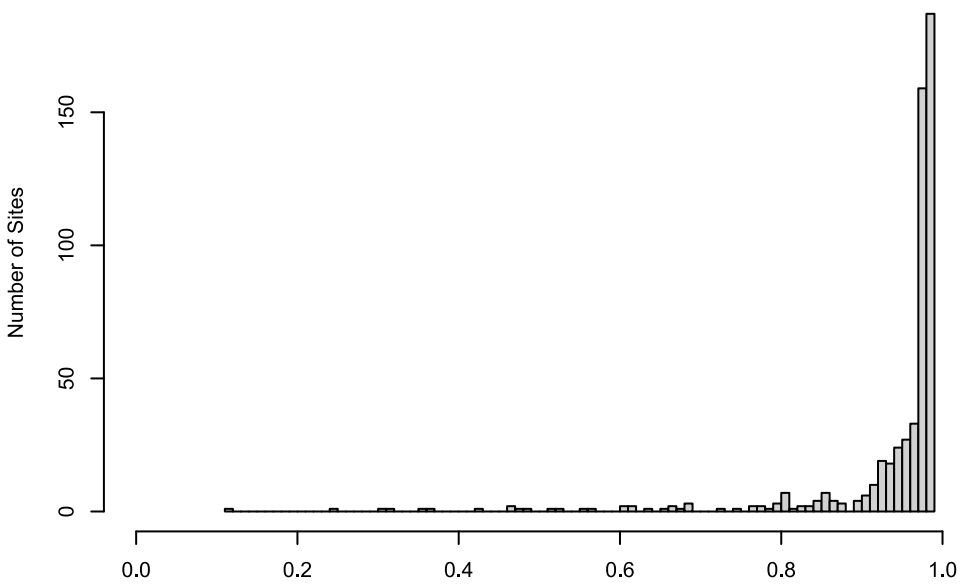

**PAR1; SCC-aware-only**

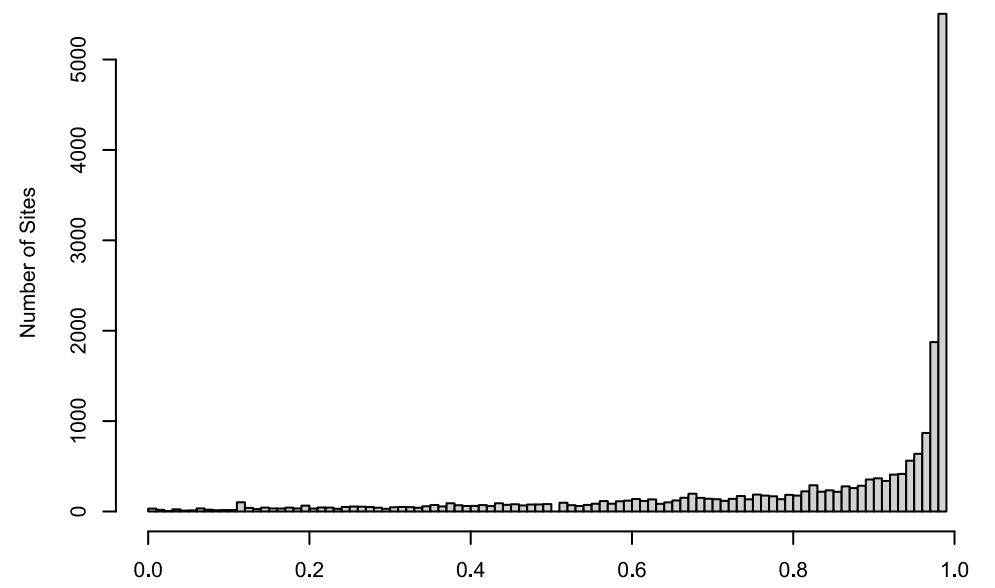

**PAR2; Default-only**

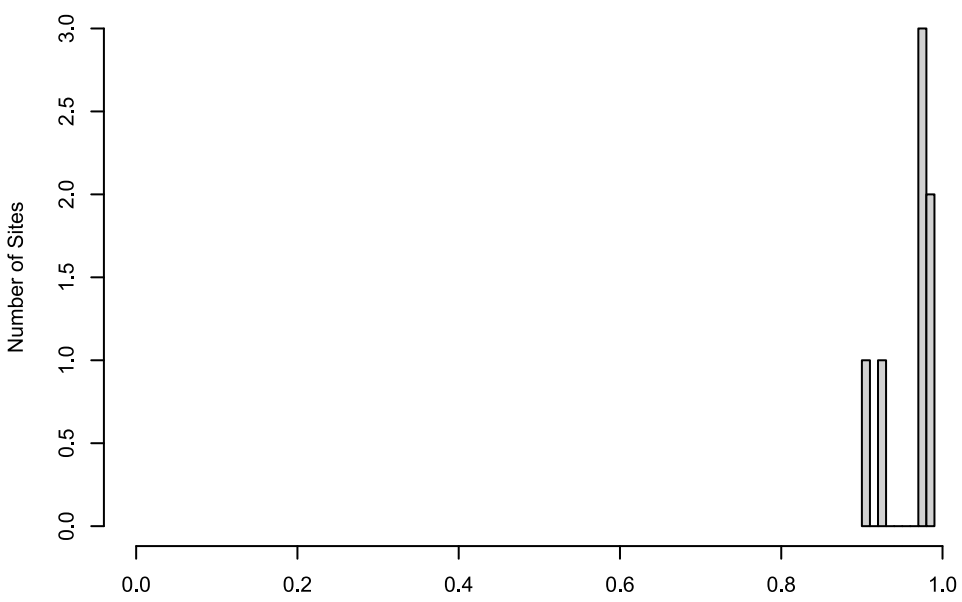

**PAR2; SCC-aware-only**

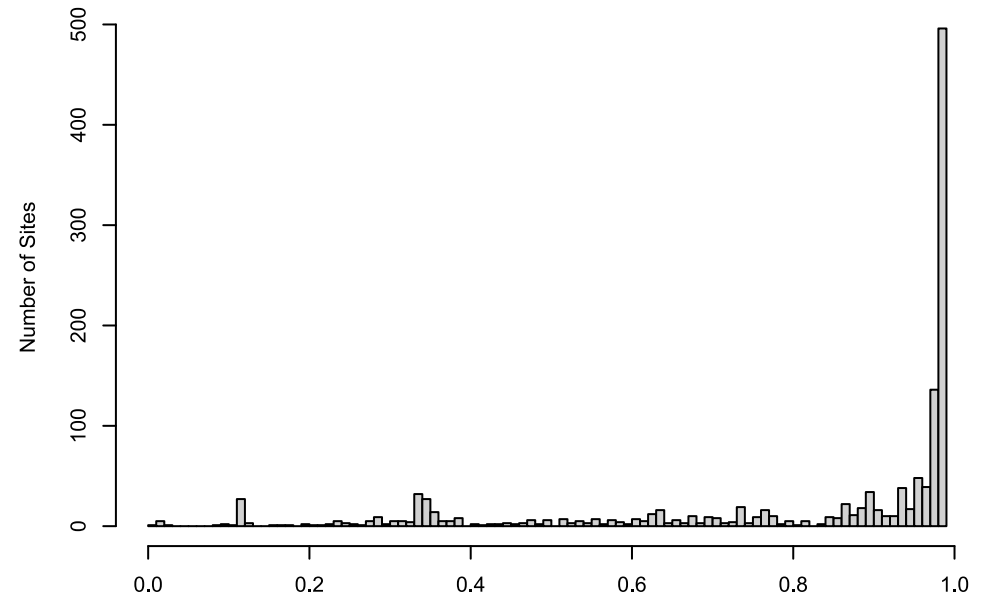

**XTR; Default-only**

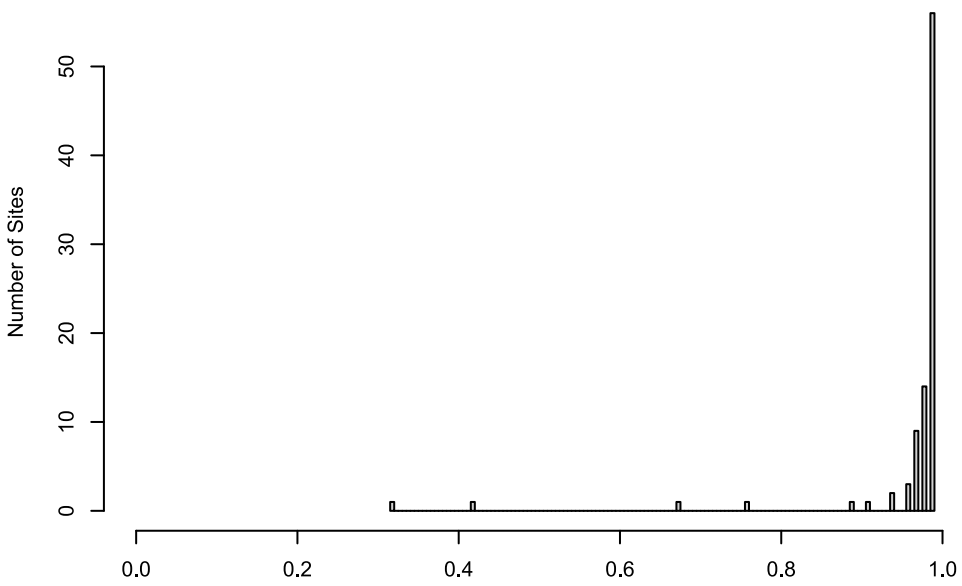

**XTR; SCC-aware-only**

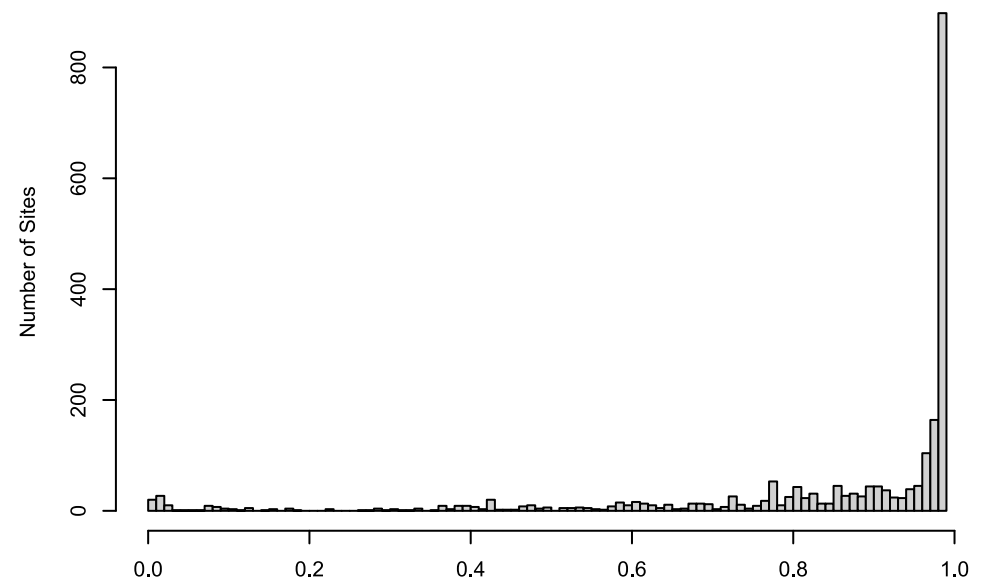

**Supplemental Figure 3:** Interrogating expression differences across the X chromosome. **(A)** We find that false changes in expression values are (i) nearly absent in the XTR, (ii) greatest in the PARs, and (iii) occur sporadically throughout regions with little sequence similarity with the Y. **(B)** No relationship between total transcript length and differences in expression values. There was also no observed relationship between expression levels and observed expression differences with either the **(C)** Default or **(D)** SCC-aware reference transcriptomes.

# Expression Differences: Default vs. SCC-aware References

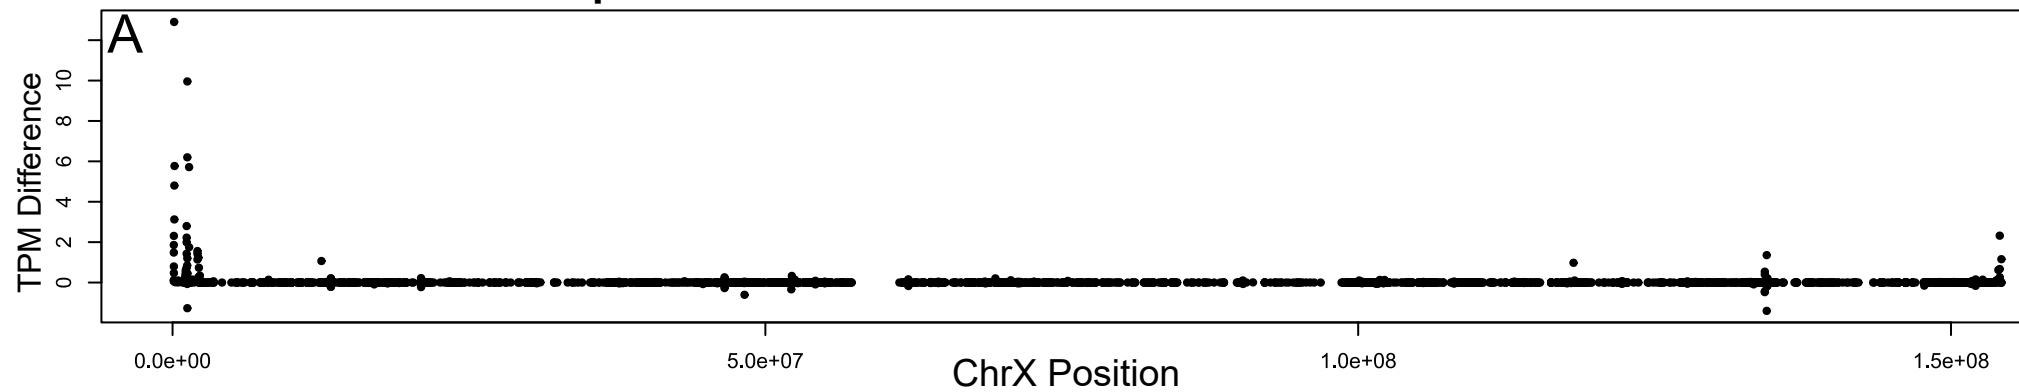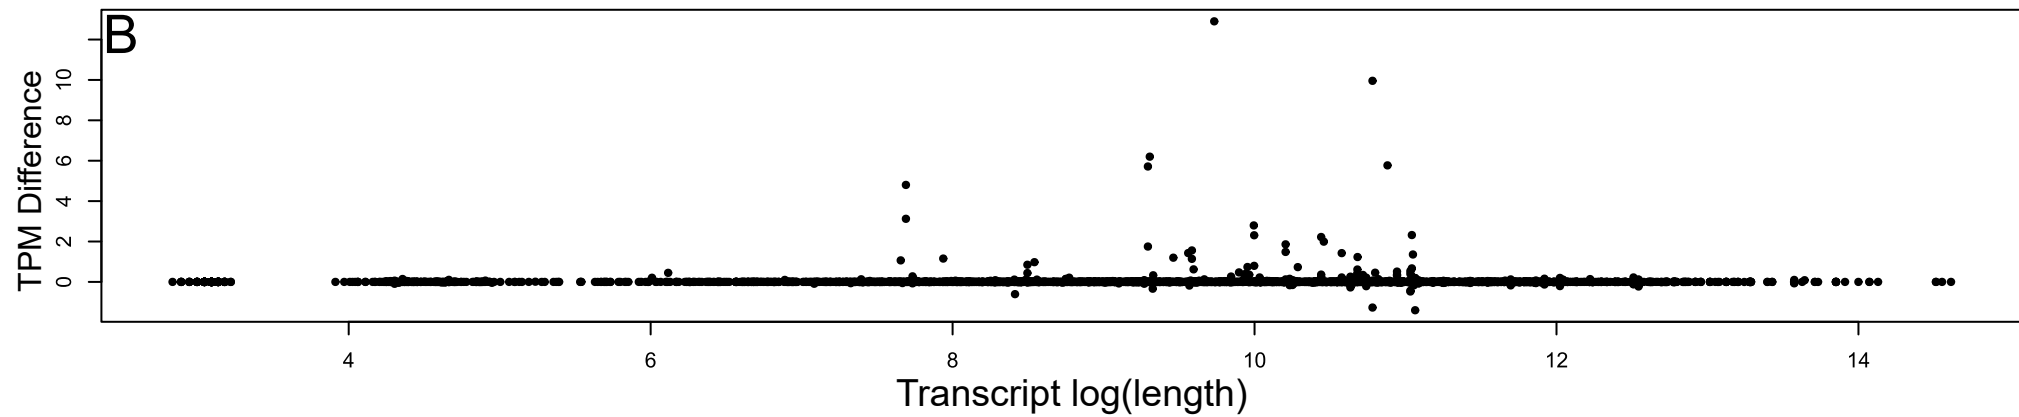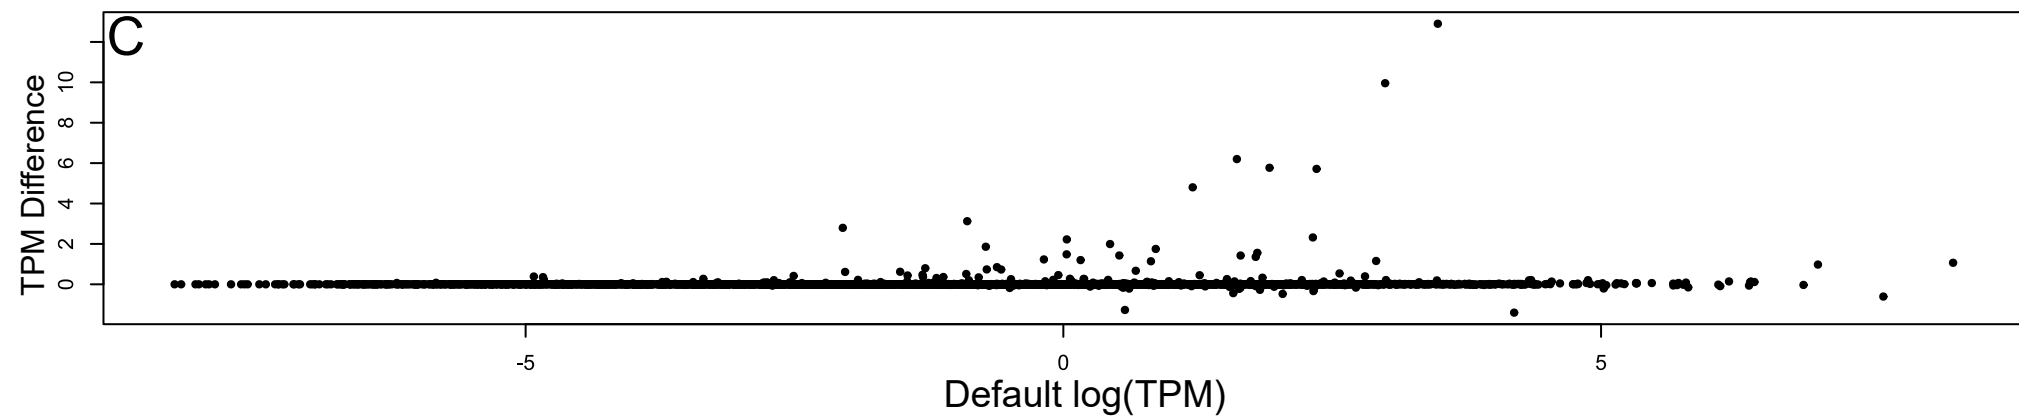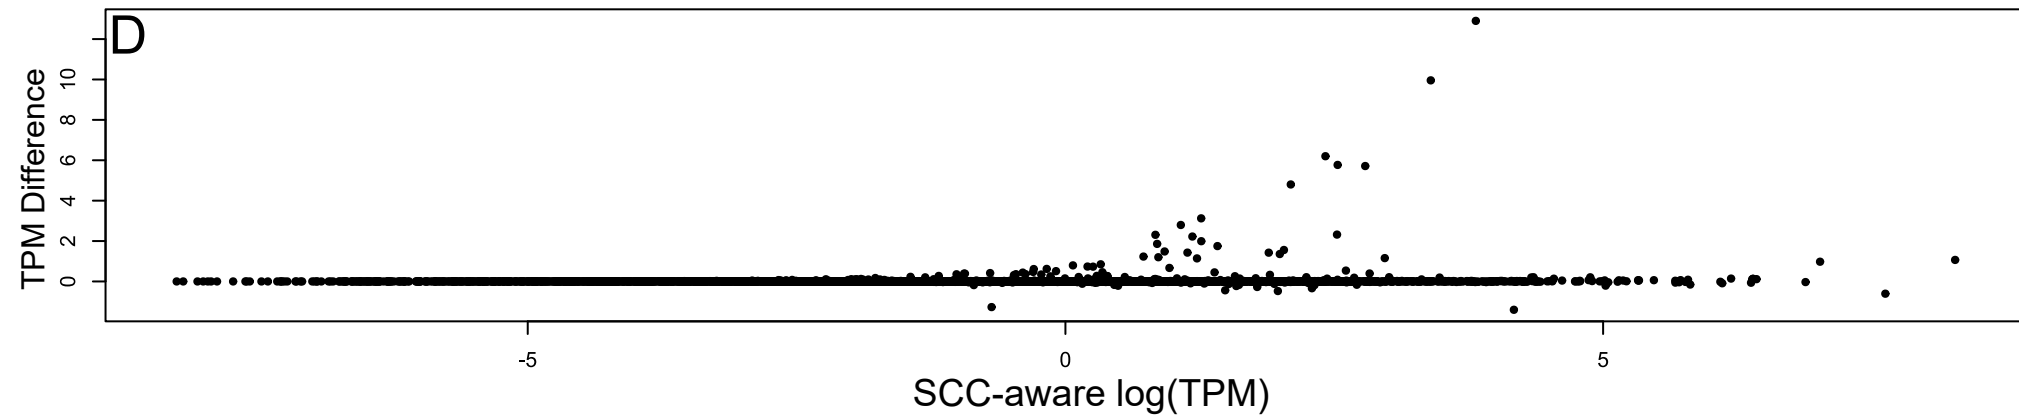

---

**Supplemental Table 1:** Numbers of properly paired reads aligned per-individual and their differences (Diff == SCC-aware - Default).

---

| <b>Sample</b> | <b>Default</b> | <b>SCC-aware</b> | <b>Diff</b> |
|---------------|----------------|------------------|-------------|
| GTEX-11GSP    | 743,538,052    | 743,514,590      | -23462      |
| GTEX-11TTK    | 762,276,120    | 762,263,034      | -13086      |
| GTEX-12WSD    | 779,860,512    | 779,877,012      | 16500       |
| GTEX-12ZZX    | 770,109,140    | 770,094,676      | -14464      |
| GTEX-1313W    | 852,501,364    | 852,498,722      | -2642       |
| GTEX-131XW    | 718,436,724    | 718,428,810      | -7914       |
| GTEX-13JUV    | 850,778,578    | 850,773,524      | -5054       |
| GTEX-13O3O    | 678,903,264    | 679,008,546      | 105282      |
| GTEX-13OVJ    | 657,151,114    | 657,202,072      | 50958       |
| GTEX-13PL6    | 807,524,294    | 807,517,724      | -6570       |
| GTEX-13QJC    | 752,669,274    | 752,663,422      | -5852       |
| GTEX-13S7M    | 871,498,252    | 871,491,502      | -6750       |
| GTEX-13SLX    | 713,876,242    | 714,000,110      | 123868      |
| GTEX-13X6K    | 829,626,906    | 829,620,008      | -6898       |
| GTEX-145MI    | 747,642,106    | 747,638,062      | -4044       |

|            |               |               |        |
|------------|---------------|---------------|--------|
| GTEX-14BIM | 807,883,826   | 807,878,368   | -5458  |
| GTEX-14BIN | 746,761,356   | 746,748,214   | -13142 |
| GTEX-14LZ3 | 814,097,488   | 814,090,184   | -7304  |
| GTEX-14PJM | 636,542,840   | 636,587,472   | 44632  |
| GTEX-14PQA | 793,581,622   | 793,576,584   | -5038  |
| GTEX-15DCD | 785,001,666   | 784,994,964   | -6702  |
| GTEX-15DYW | 769,319,014   | 769,312,500   | -6514  |
| GTEX-15ER7 | 1,032,636,384 | 1,032,596,560 | -39824 |
| GTEX-17JCI | 722,476,160   | 722,468,042   | -8118  |
| GTEX-183WM | 644,882,656   | 644,859,502   | -23154 |
| GTEX-1B933 | 786,036,470   | 786,029,174   | -7296  |
| GTEX-1CB4H | 1,023,380,652 | 1,023,367,536 | -13116 |
| GTEX-1EWIQ | 803,716,524   | 803,712,240   | -4284  |
| GTEX-1F48J | 773,146,722   | 773,139,548   | -7174  |
| GTEX-1F7RK | 677,735,730   | 677,934,982   | 199252 |
| GTEX-1F88E | 769,156,638   | 769,153,806   | -2832  |
| GTEX-1GMR8 | 736,925,836   | 736,922,506   | -3330  |
| GTEX-1GN1U | 724,367,780   | 724,358,848   | -8932  |



|                 |                    |                    |             |
|-----------------|--------------------|--------------------|-------------|
| GTEX-1GZHY      | 777,817,298        | 777,808,354        | -8944       |
| GTEX-1LH75      | 677,035,540        | 677,033,288        | -2252       |
| GTEX-1OJC4      | 718,447,988        | 718,439,508        | -8480       |
| GTEX-1R46S      | 729,160,502        | 729,151,946        | -8556       |
| GTEX-N7MT       | 1,101,259,154      | 1,101,389,954      | 130800      |
| GTEX-NPJ7       | 1,189,397,988      | 1,189,402,522      | 4534        |
| GTEX-PWO3       | 1,505,297,004      | 1,505,284,312      | -12692      |
| GTEX-Q2AG       | 1,460,521,486      | 1,460,507,080      | -14406      |
| GTEX-QDT8       | 734,468,868        | 734,467,724        | -1144       |
| GTEX-QVJO       | 936,001,950        | 935,995,918        | -6032       |
| GTEX-QVUS       | 1,022,722,188      | 1,022,716,138      | -6050       |
| GTEX-RU72       | 951,784,008        | 951,778,084        | -5924       |
| GTEX-T2IS       | 894,646,420        | 894,641,480        | -4940       |
| GTEX-TSE9       | 882,487,064        | 882,481,826        | -5238       |
| GTEX-WWYW       | 1,004,805,488      | 1,004,799,550      | -5938       |
| GTEX-X4EP       | 940,866,246        | 940,860,976        | -5270       |
| <b>Average:</b> | <b>838,995,112</b> | <b>839,001,663</b> | <b>6551</b> |

---

**Supplemental Table 2:** Numbers of aligned reads with a mapping quality score of 0 per-individual and their differences (Diff == SCC-aware - Default).

---

| <b><u>Sample</u></b> | <b><u>Default</u></b> | <b><u>SCC-aware</u></b> | <b><u>Diff</u></b> |
|----------------------|-----------------------|-------------------------|--------------------|
| GTEX-11GSP           | 52,587,267            | 51,963,148              | -624119            |
| GTEX-11TTK           | 57,280,032            | 56,705,681              | -574351            |
| GTEX-12WSD           | 63,284,582            | 62,699,648              | -584934            |
| GTEX-12ZZX           | 63,128,131            | 62,555,073              | -573058            |
| GTEX-1313W           | 56,811,303            | 56,257,030              | -554273            |
| GTEX-131XW           | 49,082,779            | 48,572,485              | -510294            |
| GTEX-13JUV           | 58,887,315            | 58,332,639              | -554676            |
| GTEX-13O3O           | 59,712,155            | 59,168,081              | -544074            |
| GTEX-13OVJ           | 52,722,912            | 52,207,406              | -515506            |
| GTEX-13PL6           | 58,661,009            | 58,119,562              | -541447            |
| GTEX-13QJC           | 54,114,368            | 53,593,977              | -520391            |
| GTEX-13S7M           | 54,699,099            | 54,117,601              | -581498            |
| GTEX-13SLX           | 59,019,631            | 58,446,241              | -573390            |
| GTEX-13X6K           | 56,917,952            | 56,386,489              | -531463            |
| GTEX-145MI           | 52,799,420            | 52,298,758              | -500662            |

|            |            |            |         |
|------------|------------|------------|---------|
| GTEX-14BIM | 61,610,959 | 61,030,765 | -580194 |
| GTEX-14BIN | 43,207,035 | 42,559,653 | -647382 |
| GTEX-14LZ3 | 62,991,712 | 62,403,932 | -587780 |
| GTEX-14PJM | 49,534,691 | 48,982,854 | -551837 |
| GTEX-14PQA | 50,100,257 | 49,540,704 | -559553 |
| GTEX-15DCD | 47,669,993 | 47,063,323 | -606670 |
| GTEX-15DYW | 43,796,294 | 43,232,473 | -563821 |
| GTEX-15ER7 | 74,279,573 | 73,529,304 | -750269 |
| GTEX-17JCI | 68,252,280 | 67,695,300 | -556980 |
| GTEX-183WM | 50,108,997 | 49,655,847 | -453150 |
| GTEX-1B933 | 54,902,828 | 54,367,966 | -534862 |
| GTEX-1CB4H | 75,562,943 | 74,817,585 | -745358 |
| GTEX-1EWIQ | 55,647,825 | 55,080,569 | -567256 |
| GTEX-1F48J | 56,413,907 | 55,844,076 | -569831 |
| GTEX-1F7RK | 56,474,139 | 55,910,411 | -563728 |
| GTEX-1F88E | 28,710,651 | 28,338,932 | -371719 |
| GTEX-1GMR8 | 51,148,341 | 50,661,769 | -486572 |
| GTEX-1GN1U | 55,599,531 | 55,075,668 | -523863 |

|                 |                   |                   |                |
|-----------------|-------------------|-------------------|----------------|
| GTEX-1GZHY      | 58,201,555        | 57,655,445        | -546110        |
| GTEX-1LH75      | 33,992,212        | 33,621,491        | -370721        |
| GTEX-1OJC4      | 40,547,630        | 39,981,337        | -566293        |
| GTEX-1R46S      | 44,843,832        | 44,371,247        | -472585        |
| GTEX-N7MT       | 82,630,657        | 81,661,679        | -968978        |
| GTEX-NPJ7       | 89,262,358        | 88,282,682        | -979676        |
| GTEX-PWO3       | 100,949,535       | 99,828,089        | -1121446       |
| GTEX-Q2AG       | 99,396,799        | 98,307,124        | -1089675       |
| GTEX-QDT8       | 24,714,409        | 24,395,809        | -318600        |
| GTEX-QVJO       | 56,956,907        | 56,279,207        | -677700        |
| GTEX-QVUS       | 67,919,175        | 67,198,696        | -720479        |
| GTEX-RU72       | 67,284,764        | 66,662,729        | -622035        |
| GTEX-T2IS       | 52,908,632        | 52,188,901        | -719731        |
| GTEX-TSE9       | 58,283,906        | 57,678,080        | -605826        |
| GTEX-WWYW       | 65,204,859        | 64,483,930        | -720929        |
| GTEX-X4EP       | 57,656,597        | 56,997,932        | -658665        |
| <b>Average:</b> | <b>57,887,219</b> | <b>57,281,823</b> | <b>-605396</b> |

**Supplemental Table 3:** Per individual number of SNPs called noting no outlier individuals suggesting potentially false positives. Diff=SCC[-aware]-Def[ault]

| <b>Sample</b> | <b>chr8 (Def)</b> | <b>chr8 (SCC)</b> | <b>chr8 (Diff)</b> | <b>chrX (Def)</b> | <b>chrX (SCC)</b> | <b>chrX (Diff)</b> |
|---------------|-------------------|-------------------|--------------------|-------------------|-------------------|--------------------|
| GTEX-11GSP    | 170326            | 170324            | -2                 | 93320             | 99972             | 6652               |
| GTEX-11TTK    | 175931            | 175921            | -10                | 88627             | 95224             | 6597               |
| GTEX-12WSD    | 226710            | 226708            | -2                 | 148019            | 156376            | 8357               |
| GTEX-12ZZX    | 178513            | 178513            | 0                  | 94381             | 100696            | 6315               |
| GTEX-1313W    | 174948            | 174945            | -3                 | 93046             | 99266             | 6220               |
| GTEX-131XW    | 177765            | 177766            | 1                  | 92975             | 99458             | 6483               |
| GTEX-13JUV    | 237761            | 237761            | 0                  | 156218            | 164340            | 8122               |
| GTEX-13O3O    | 177356            | 177337            | -19                | 97231             | 103865            | 6634               |
| GTEX-13OVJ    | 176250            | 176242            | -8                 | 92377             | 98675             | 6298               |
| GTEX-13PL6    | 184386            | 184384            | -2                 | 99694             | 106357            | 6663               |
| GTEX-13QJC    | 174202            | 174198            | -4                 | 94956             | 101369            | 6413               |
| GTEX-13S7M    | 176781            | 176773            | -8                 | 97856             | 104586            | 6730               |
| GTEX-13SLX    | 227689            | 227679            | -10                | 158971            | 167289            | 8318               |
| GTEX-13X6K    | 176829            | 176833            | 4                  | 98562             | 105018            | 6456               |

|            |        |        |     |        |        |      |
|------------|--------|--------|-----|--------|--------|------|
| GTEX-145MI | 180230 | 180221 | -9  | 96266  | 102756 | 6490 |
| GTEX-14BIM | 174321 | 174318 | -3  | 94983  | 101611 | 6628 |
| GTEX-14BIN | 175646 | 175637 | -9  | 92269  | 98852  | 6583 |
| GTEX-14LZ3 | 168114 | 168112 | -2  | 97801  | 104341 | 6540 |
| GTEX-14PJM | 179596 | 179590 | -6  | 92756  | 99146  | 6390 |
| GTEX-14PQA | 174755 | 174754 | -1  | 96647  | 103237 | 6590 |
| GTEX-15DCD | 176549 | 176548 | -1  | 97316  | 103664 | 6348 |
| GTEX-15DYW | 174323 | 174313 | -10 | 92837  | 99687  | 6850 |
| GTEX-15ER7 | 176037 | 176024 | -13 | 95542  | 101525 | 5983 |
| GTEX-17JCI | 172198 | 172194 | -4  | 89354  | 95742  | 6388 |
| GTEX-183WM | 173002 | 173002 | 0   | 99420  | 105737 | 6317 |
| GTEX-1B933 | 170274 | 170270 | -4  | 98125  | 104067 | 5942 |
| GTEX-1CB4H | 177861 | 177864 | 3   | 89546  | 95366  | 5820 |
| GTEX-1EWIQ | 175684 | 175685 | 1   | 97071  | 103582 | 6511 |
| GTEX-1F48J | 175759 | 175758 | -1  | 95263  | 101619 | 6356 |
| GTEX-1F7RK | 174431 | 174430 | -1  | 100467 | 107217 | 6750 |
| GTEX-1F88E | 176955 | 176947 | -8  | 99597  | 105950 | 6353 |
| GTEX-1GMR8 | 174315 | 174301 | -14 | 93455  | 100245 | 6790 |

|            |        |        |    |        |        |      |
|------------|--------|--------|----|--------|--------|------|
| GTEX-1GN1U | 180183 | 180174 | -9 | 101162 | 107631 | 6469 |
| GTEX-1GZHY | 176848 | 176844 | -4 | 94084  | 100236 | 6152 |
| GTEX-1LH75 | 177424 | 177426 | 2  | 96356  | 102311 | 5955 |
| GTEX-1OJC4 | 173138 | 173136 | -2 | 94733  | 101247 | 6514 |
| GTEX-1R46S | 175986 | 175985 | -1 | 91872  | 98609  | 6737 |
| GTEX-N7MT  | 173229 | 173226 | -3 | 94344  | 101030 | 6686 |
| GTEX-NPJ7  | 174748 | 174756 | 8  | 96675  | 102994 | 6319 |
| GTEX-PWO3  | 168746 | 168746 | 0  | 92403  | 98820  | 6417 |
| GTEX-Q2AG  | 176197 | 176193 | -4 | 95794  | 102046 | 6252 |
| GTEX-QDT8  | 178424 | 178426 | 2  | 98435  | 104887 | 6452 |
| GTEX-QVJO  | 167814 | 167813 | -1 | 89697  | 95740  | 6043 |
| GTEX-QVUS  | 177249 | 177249 | 0  | 93340  | 99673  | 6333 |
| GTEX-RU72  | 179638 | 179638 | 0  | 98649  | 105135 | 6486 |
| GTEX-T2IS  | 177434 | 177434 | 0  | 96054  | 102236 | 6182 |
| GTEX-TSE9  | 172480 | 172478 | -2 | 97895  | 104231 | 6336 |
| GTEX-WWYW  | 178286 | 178293 | 7  | 94301  | 100727 | 6426 |
| GTEX-X4EP  | 172029 | 172029 | 0  | 94240  | 100860 | 6620 |

---

|                 |                 |                 |             |                |                 |               |
|-----------------|-----------------|-----------------|-------------|----------------|-----------------|---------------|
| <b>Average:</b> | <b>178884.7</b> | <b>178881.6</b> | <b>-3.1</b> | <b>98877.2</b> | <b>105413.2</b> | <b>6536.0</b> |
|-----------------|-----------------|-----------------|-------------|----------------|-----------------|---------------|

---

**Supplemental Table 4:** List of ASE transcript dropouts not recovered using the Default genome configuration but recovered using the SCC-aware reference alignment.

| Chr | Start        | Stop         | Transcript         | Source     | Type | Gene         |
|-----|--------------|--------------|--------------------|------------|------|--------------|
| X   | 104530       | 131585       | rna-NM_001370370.1 | BestRefSeq | mRNA | PLCXD1       |
| X   | 109615       | 131585       | rna-NM_018390.4    | BestRefSeq | mRNA | PLCXD1       |
| X   | 111612<br>5  | 115534<br>4  | rna-NM_001161531.2 | BestRefSeq | mRNA | CSF2RA       |
| X   | 111612<br>5  | 115965<br>4  | rna-NM_001161529.2 | BestRefSeq | mRNA | CSF2RA       |
| X   | 111612<br>5  | 117271<br>3  | rna-NM_001379161.1 | BestRefSeq | mRNA | CSF2RA       |
| X   | 111612<br>5  | 117480<br>2  | rna-NM_001379159.1 | BestRefSeq | mRNA | CSF2RA       |
| X   | 111712       | 131585       | rna-NM_001370373.1 | BestRefSeq | mRNA | PLCXD1       |
| X   | 122979<br>7  | 123576<br>0  | rna-NM_001636.4    | BestRefSeq | mRNA | SLC25A6      |
| X   | 139302<br>1  | 140388<br>9  | rna-NM_005088.3    | BestRefSeq | mRNA | AKAP17A      |
| X   | 139684<br>4  | 144190<br>7  | rna-NM_004043.3    | BestRefSeq | mRNA | ASMT         |
| X   | 1.54E+<br>08 | 1.54E+<br>08 | rna-NM_001394353.1 | BestRefSeq | mRNA | SPRY3        |
| X   | 1.54E+<br>08 | 1.54E+<br>08 | rna-NM_005840.4    | BestRefSeq | mRNA | SPRY3        |
| X   | 1.54E+<br>08 | 1.54E+<br>08 | rna-NM_001145149.3 | BestRefSeq | mRNA | VAMP7        |
| X   | 1.54E+<br>08 | 1.54E+<br>08 | rna-XM_047447120.1 | Gnomon     | mRNA | LOC124908551 |



|   |             |             |                        |            |      |      |
|---|-------------|-------------|------------------------|------------|------|------|
| X | 230426<br>7 | 234942<br>4 | rna-<br>NM_001321367.2 | BestRefSeq | mRNA | CD99 |
| X | 230426<br>7 | 235429<br>7 | rna-<br>NM_001122898.3 | BestRefSeq | mRNA | CD99 |

---
